# Supplementary material for: Spatio-temporal analysis of leprosy risks in a municipality in the state of Mato Grosso-Brazilian Amazon: results from the leprosy post-exposure prophylaxis program in Brazil
Source: PubMed Central journal article supplement (PMC8862266; doi:10.1186/s40249-022-00943-7), 2022-02-22

2016

2017

2018

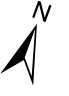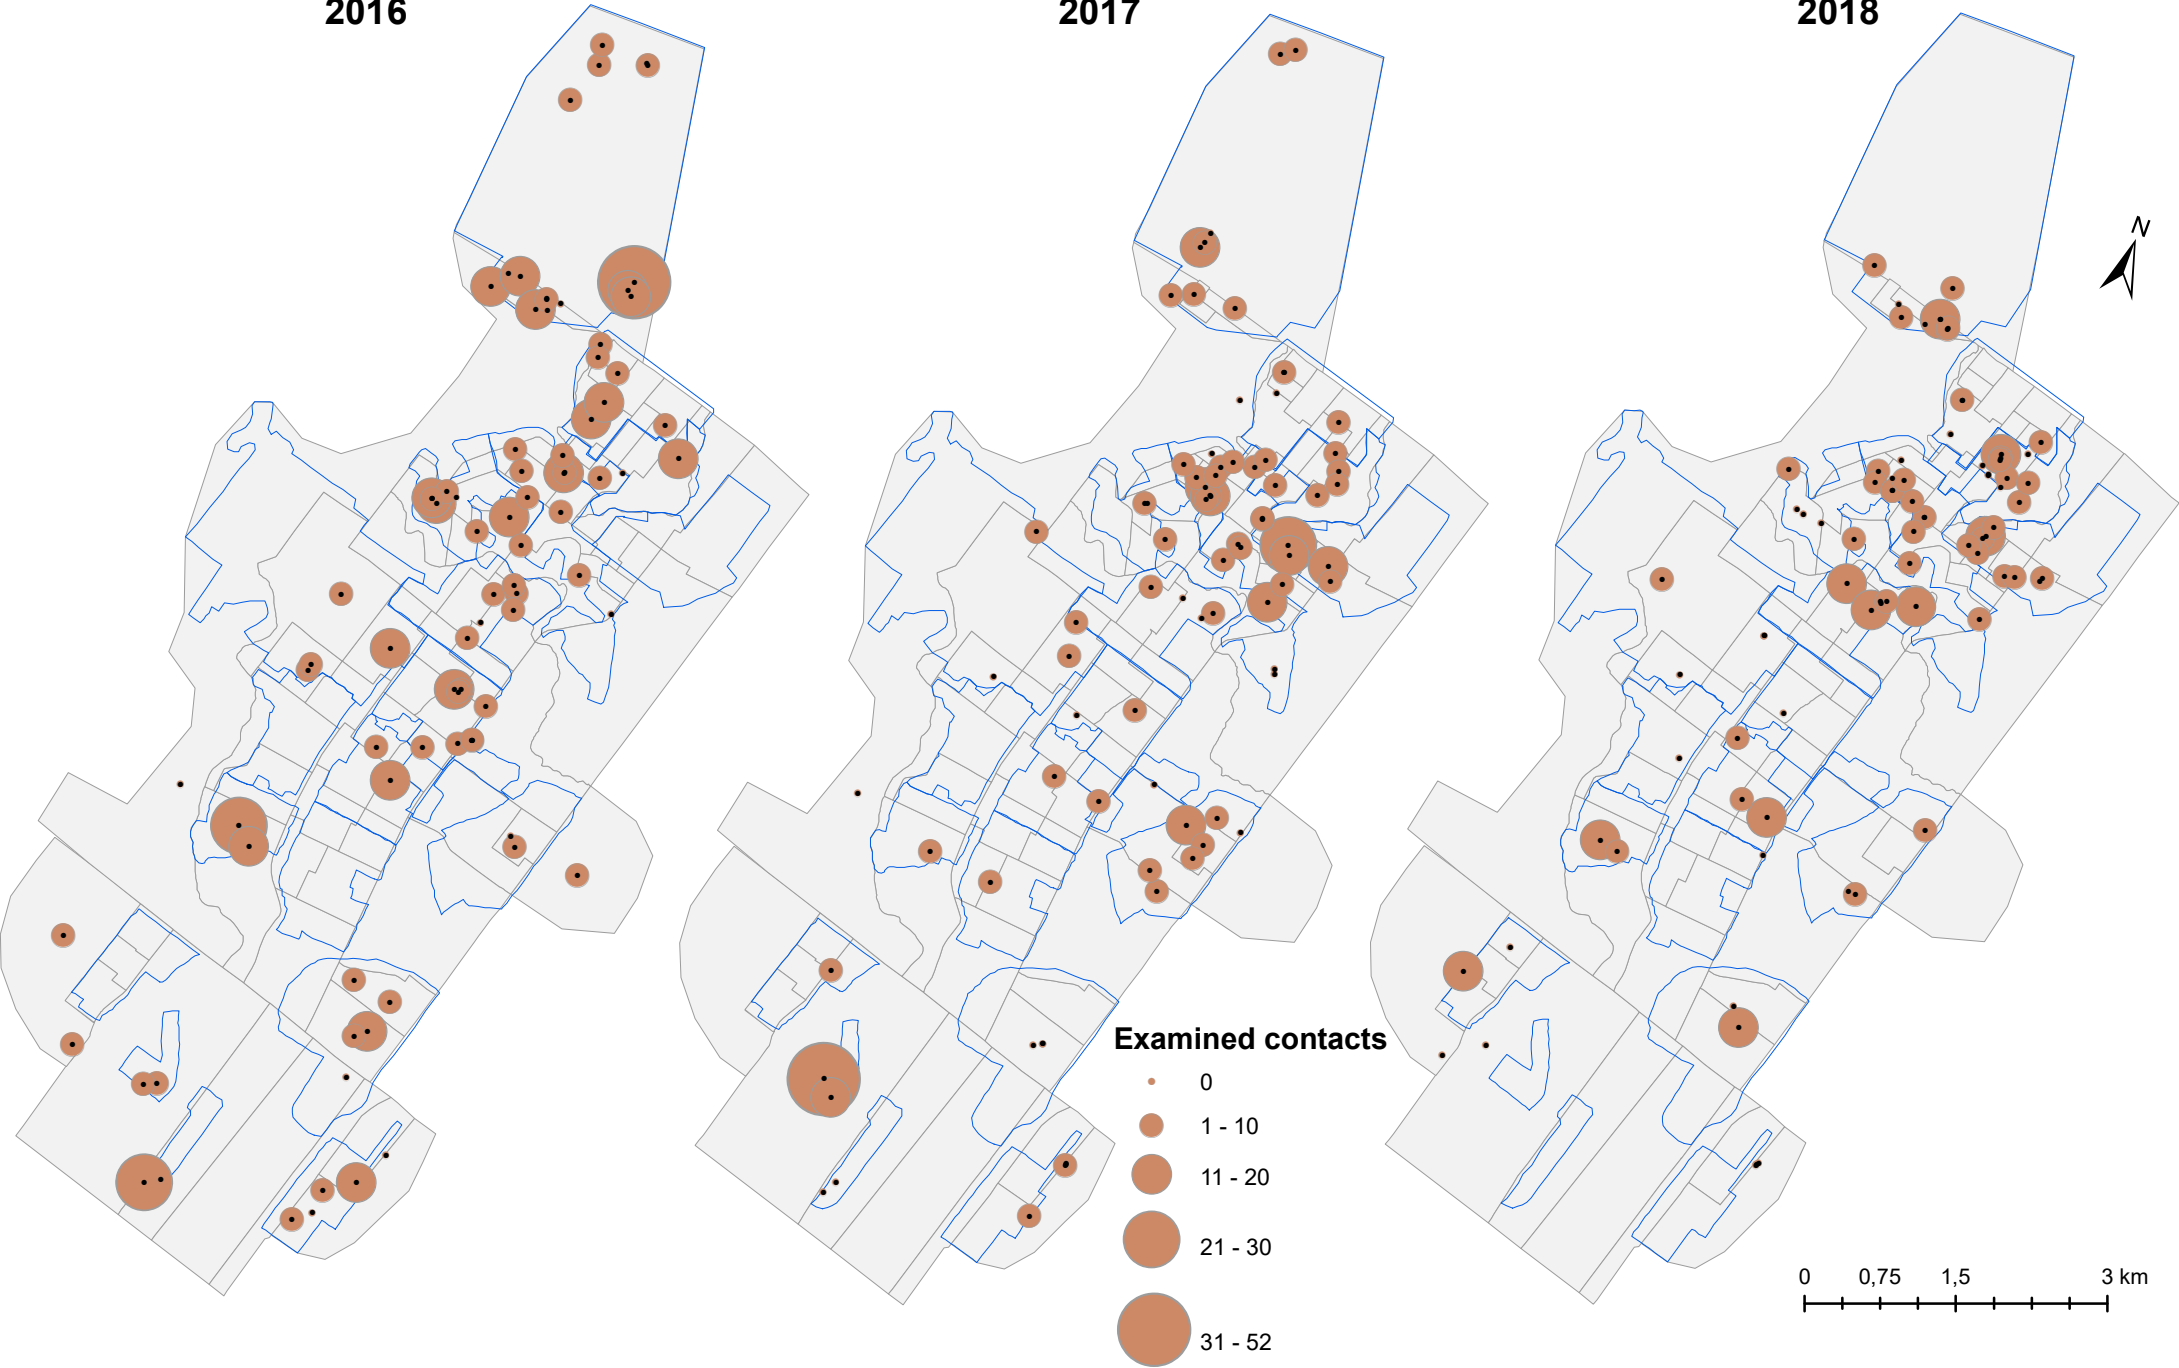

**Examined contacts**

-  0
-  1 - 10
-  11 - 20
-  21 - 30
-  31 - 52

-  Health unit area
-  Census tracts

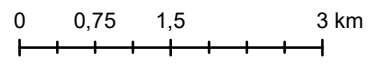

Supplement: 40249_2022_943_MOESM2_ESM.pdf [file 40249_2022_943_MOESM2_ESM.pdf]
